# Supplementary material for: Analyte-mediated growth of gold nanoparticles for non-aggregation-based colorimetric detection of manganese(ii)
Source: Royal Society of Chemistry journal article supplement (doi:10.1039/d6ra02740g), 2026-06-02
Supplement: d6ra02740g1.pdf [file d6ra02740g1.pdf]

## Analyte-mediated Growth of Gold Nanoparticles for Non-aggregation

### Colorimetric Detection of Manganese (II)

Melisew Tadele Alula\*, Mildred Lesang Madingwane

Department of Chemical and Forensic Sciences, School of Pure and Applied Sciences,  
Botswana International University of Science and Technology, Plot 10071, Private Bag 16,  
Palapye, Botswana. E-mail: alulam@biust.ac.bw; Fax: +267-4900102; Tel: +267-76126741

#### Supplementary data

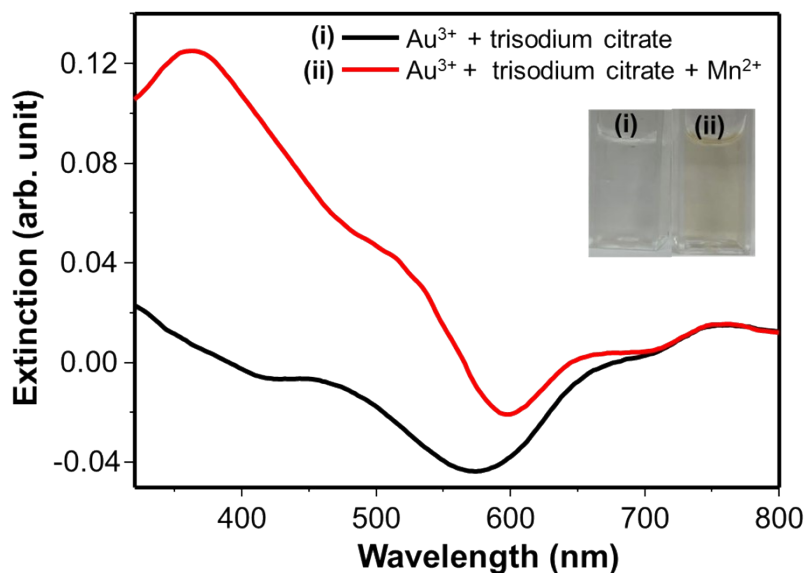

**Fig. S1** UV/Visible absorption spectra of  $\text{HAuCl}_4$  + trisodium citrate and  $\text{HAuCl}_4$  + trisodium citrate +  $\text{Mn}^{2+}$  mixtures. The concentrations of  $\text{HAuCl}_4$ , trisodium citrate, and  $\text{Mn}^{2+}$  are 0.25 mM, 8 mM, and 100  $\mu\text{M}$  respectively. The inset shows the picture of the mixtures.

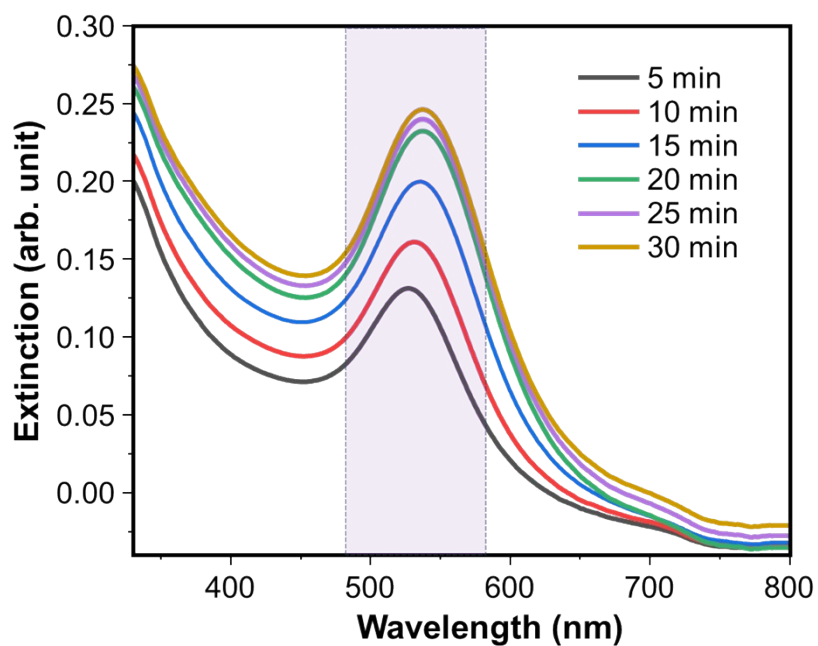

**Fig. S2** Extinction spectra of AuNPs evolved with time in the presence of  $\text{Mn}^{2+}$ .

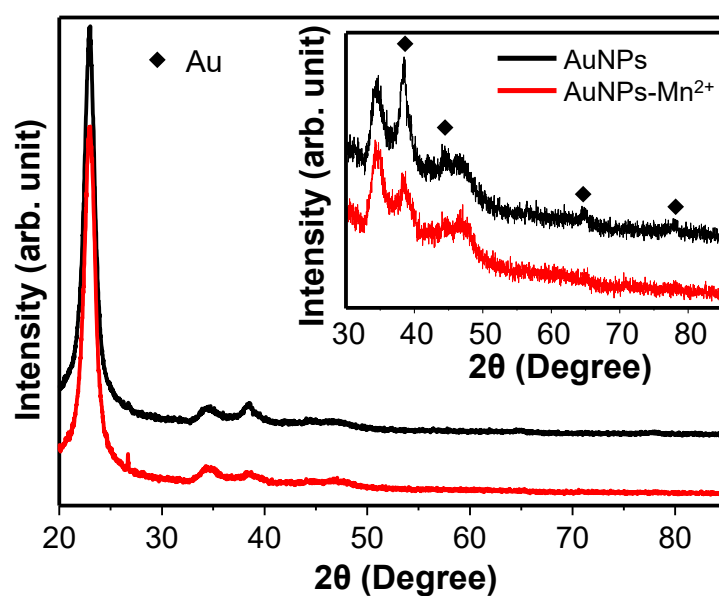

**Fig. S3** XRD patterns of AuNPs deposited on filter paper. The inset shows the enlarged XRD patterns.

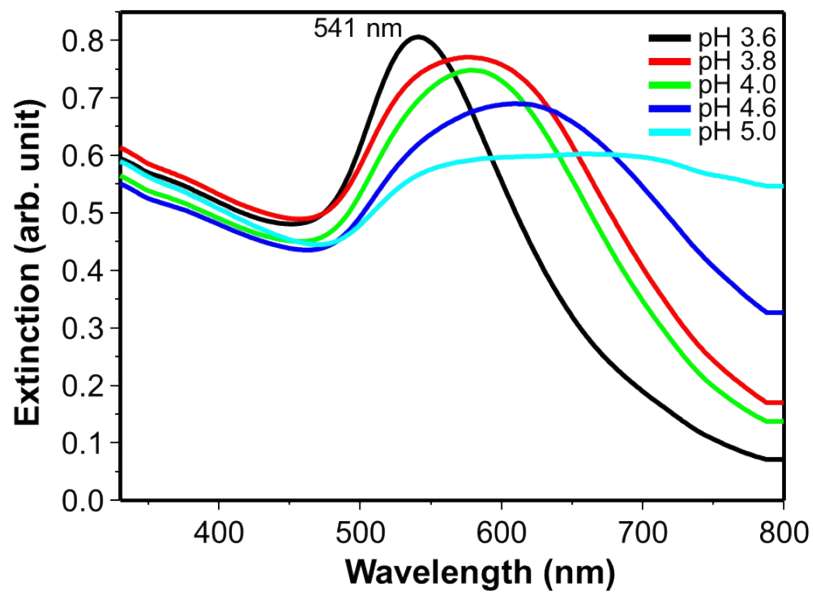

**Fig. S4** Extinction spectra of AuNPs after addition of 100  $\mu\text{M}$   $\text{Mn}^{2+}$  using buffer of different pH.

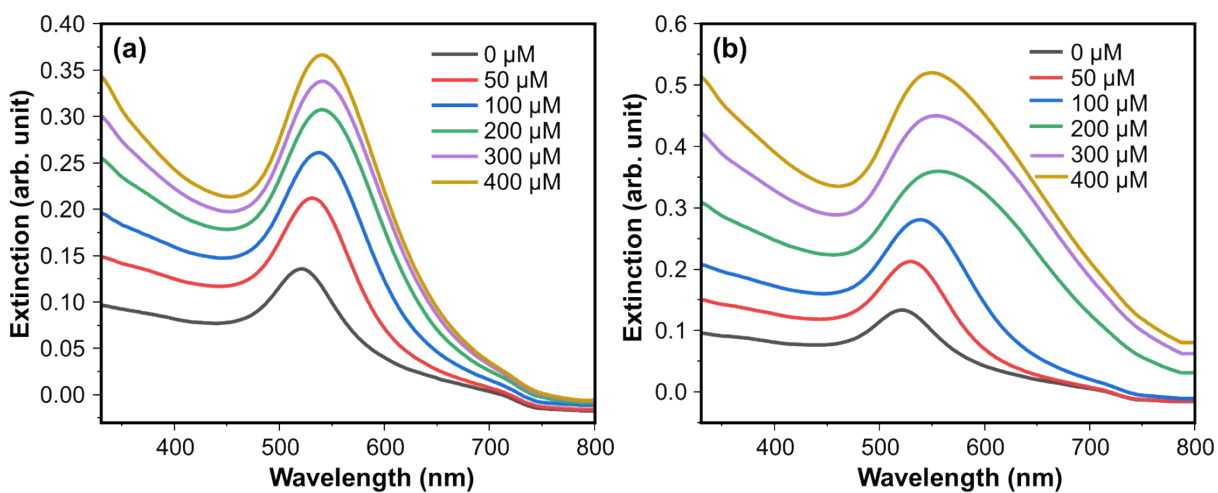

**Fig. S5** Extinction spectra of AuNPs showing effect of concentration of  $\text{HAuCl}_4$  on addition of (a) 10  $\mu\text{M}$   $\text{Mn}^{2+}$  and (b) 50  $\mu\text{M}$   $\text{Mn}^{2+}$ .
